# Supplementary material for: Tauroursodeoxycholic Acid Reduces Neuroinflammation but Does Not Support Long Term Functional Recovery of Rats with Spinal Cord Injury
Source: MDPI journal article supplement (doi:10.3390/biomedicines10071501), 2022-06-25
Supplement: s1 [file s1]

# Supplementary Materials

**Table S1.** Effect of SCI and TUDCA treatment on the expression of genes associated with microglial activation.

| Gene          | Expression; Mean, Normalized to 36B4 |                        |                        | Dunnett's Post-Hoc Test |                  |
|---------------|--------------------------------------|------------------------|------------------------|-------------------------|------------------|
|               | <u>laminectomy</u>                   | SCI, control           | SCI-T600               | Sham vs. SCI            | SCI vs. SCI-T600 |
| IL-6          | $1.00 \times 10^{-3}$                | $2.45 \times 10^{-3}$  | $1.03 \times 10^{-3}$  | $p < 0.001$             | $p < 0.001$      |
| IL-12 $\beta$ | $5.98 \times 10^{-4}$                | $3.33 \times 10^{-4}$  | $7.06 \times 10^{-4}$  | n.s.                    | n.s.             |
| CCL-2         | $0.44 \times 10^{-2}$                | $3.33 \times 10^{-2}$  | $1.84 \times 10^{-2}$  | $p < 0.05$              | n.s.             |
| HMGB1         | $0.195 \times 10^{-3}$               | $0.449 \times 10^{-3}$ | $0.081 \times 10^{-3}$ | n.s.                    | $p < 0.05$       |
| IFN $\beta$   | $4.99 \times 10^{-4}$                | $7.94 \times 10^{-4}$  | $4.66 \times 10^{-4}$  | n.s.                    | $p < 0.05$       |
| PKM2          | 0.285                                | 0.687                  | 0.178                  | $p < 0.05$              | $p < 0.001$      |
| arg-1         | $0.79 \times 10^{-2}$                | $3.21 \times 10^{-2}$  | $0.97 \times 10^{-2}$  | $p < 0.01$              | $p < 0.01$       |
| IL-4R         | $0.20 \times 10^{-2}$                | $1.12 \times 10^{-2}$  | $0.30 \times 10^{-2}$  | $p < 0.01$              | $p < 0.01$       |
| IL-10         | $3.49 \times 10^{-4}$                | $0.74 \times 10^{-4}$  | $1.91 \times 10^{-4}$  | $p < 0.01$              | n.s.             |

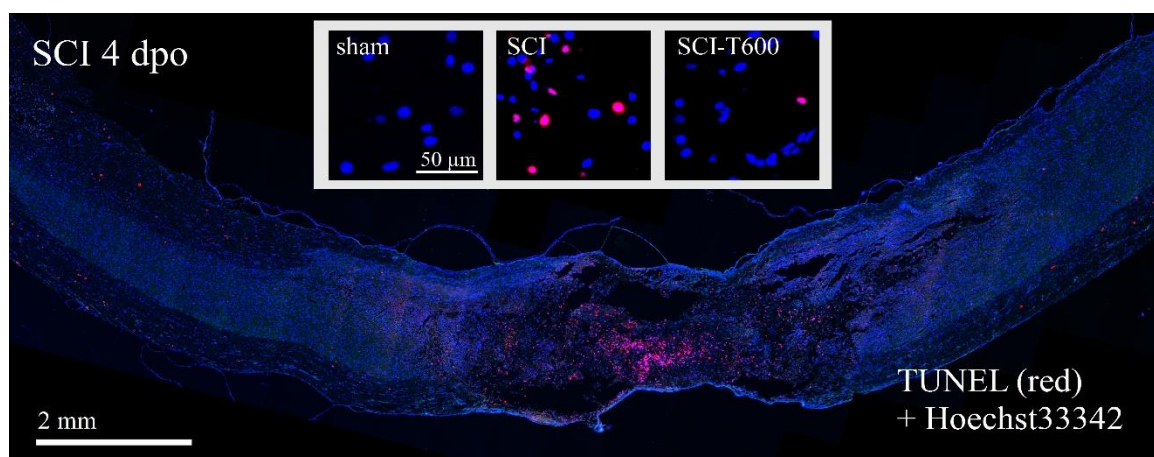

**Figure S1.** SCI-induced apoptosis as shown with TUNEL staining. Overview of a spinal cord section at 4 dpo with a high degree of apoptosis within the lesion center; magenta coloration indicates TUNEL fluorescence (red) of cell nuclei stained with Hoechst-33342 (blue). **Insets:** High magnification images of TUNEL staining at 4 mm distance from the lesion site after laminectomy (sham), SCI-control and SCI-T600.
